# Supplementary material
Source: Springer Nature journal article supplement (https://www.springermedizin.de/resource/supplementary/13048_2009_24_MOESM1_ESM.pdf/9664728)

**A.****Normal****Endometrioid Adenocarcinomas**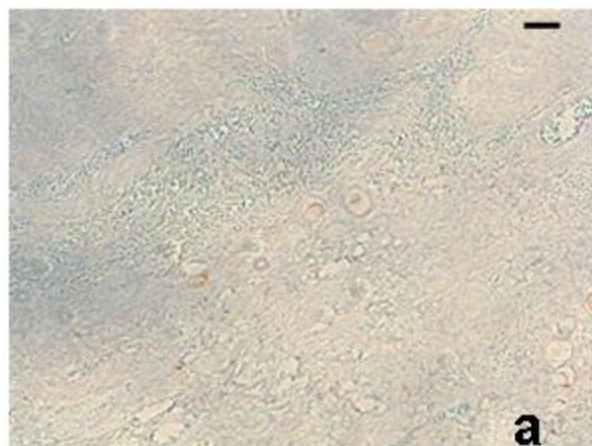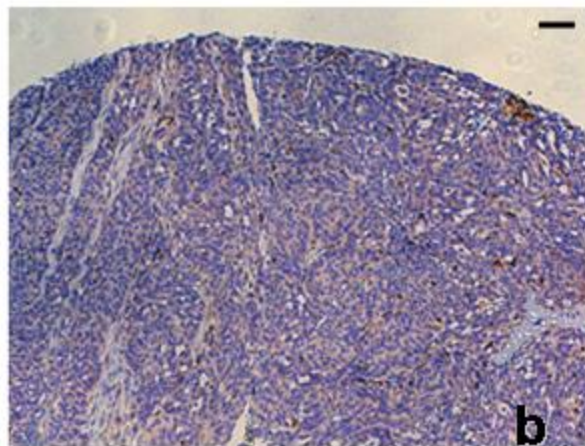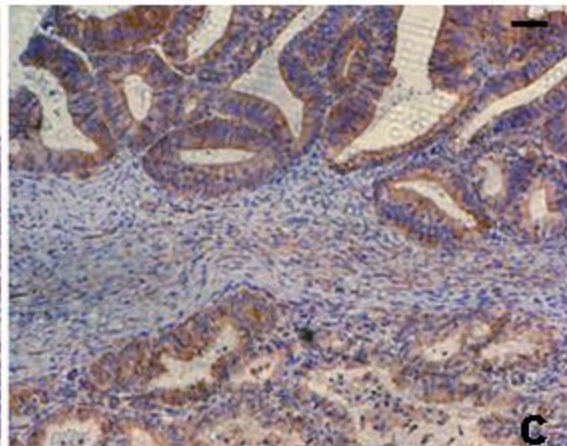**B.**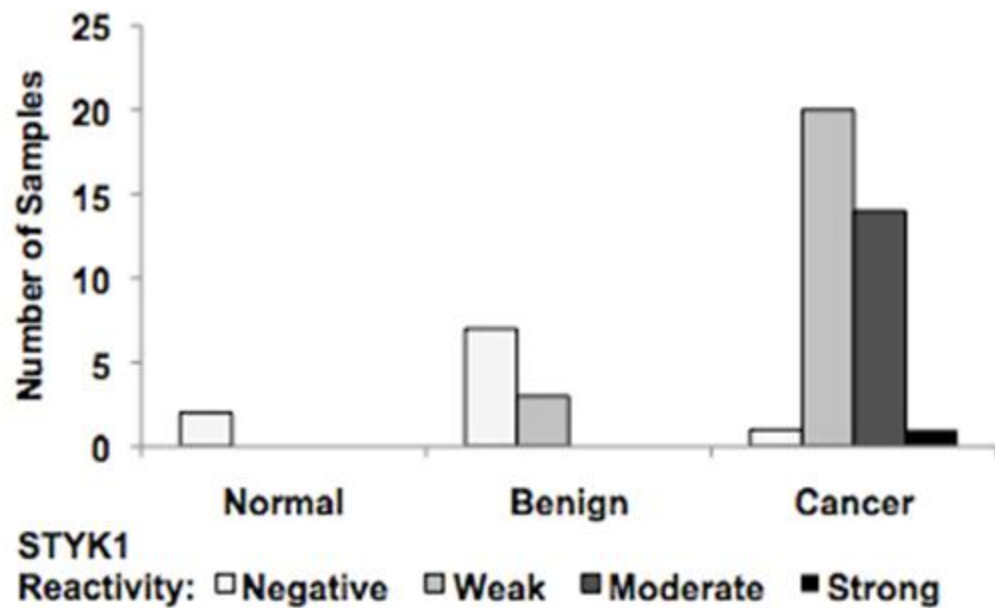

Supplement: MOESM1 [file 9664728]
